# Supplementary material for: Sulfate Deficiency as a Risk Factor for Autism
Source: J Autism Dev Disord. 2019 Sep 27;50(1):153–61. doi: 10.1007/s10803-019-04240-5 (PMC6946761; doi:10.1007/s10803-019-04240-5)
Supplement: Supplementary file 1 — Supplementary material 1 (XLS 324 kb) [file 10803_2019_4240_MOESM1_ESM.xls]

## Sheet: Full Set
		Autism Data Chart (Full Set)
	S1-S4 are water sample sulfate values in mg/l									Coff, Beer, Liq7 and Liq8 are beverage values in mg/serving																Xyy is a rejected data line
	G1-G4 are water sample 8 oz glasses per day									G5 thru G8 are beverage servings (glasses)																Uyy is from USA at large
	GT4 = G1+G2+G3+G4									Water sulfate in mg: WatMg = (0.24g/glass)*WatAv*GT4																Hyy is a high incidence state
	WatAv is average water sulfate weighted by glasses									Beverage sulfate in mg: BevMg = B5G5+B6G6+B7G7+B8G8																Lyy is a low incidence state
	WatAv = (S1G1+S2G2+S3G3+S4G4) / GT4									AZC means Phoenix and Tucson canal zone at ~245 mg/l																AZC is Arizonal canal zone
	Degree = M (mild), MO (mod), MS (mod/sev), SEV (severe)									CAC is California coast 60-400 mg/l while CAL is 0-59 mg/l																CAC and CAL are SoCal coast
Zone	Key	Tap	WatAv	GT4	WatMg	BevMg	TotMg	S1	G1	S2	G2	S3	G3	S4	G4	Coff	G5	Beer	G6	Liq7	G7	Liq8	G8		Zone	Key	Age	Sex	Deg		Sample 1	Sample 2	Brand 3	Brand 4	Coffee 5	B 6	Liquid 7	Liquid 8	Notes
UCA	001	2	0.206897	14.5	0.72	312	312.72	0	13	2	1.5					24	13								UCA	001	5	B	MO		Ref Filter	Raw Tap			Coffee				13 Coffee
CAC	002	105	29.7273	11	78.48	72	150.48	103	2	105	1	2	8			24	2			24	1				CAC	002	8	B	M		Kitchen	Bathroom	All Types		Coffee, Tea		Milk
HME	3.1	1	0.857143	7	1.44	48	49.44	1	3	1	3	0	1			24	2								HME	3.1	13	G	M		Tap Water	Brita	Aquafina		Coffee
HME	3.2	1	0.857143	7	1.44	48	49.44	1	3	1	3	0	1			24	2								HME	3.2	15	B	SEV		Tap Water	Brita	Aquafina		Coffee
XWA	004	258	88.5556	9	191.28	24	215.28	258	3	1	3	10	2	0	1	24	1								XWA	004	3	B	SEV		WA Tap	Glacier	VitaCoco	Starbucks	Coffee				Suspect
CAC	005	69	1	13	3.12	81	84.12	2	6.5	0	6.5					18	4.5								CAC	005	3	B	SEV		Purified	Sparklets			Tea
CAL	006	37	13.6667	12	39.36	24	63.36	2	8	37	4					24	1								CAL	006	2	B	MO		Ralphs	Tap Water			Coffee
AZC	007	176	53.8462	13	168	199	367	19	8	176	3	10	2			18	5			24	4	13	1		AZC	007	13	B	M		RO Filtered	Tap Water	Dasani		Tea		Milk	Juice Citrus
CAL	008	4	1.6	20	7.68	129	136.68	1	8	4	6	0	3	0	3	18	4	57	1						CAL	008	2	B	SEV		Palomar	Tap Water	Kirkland	Smart	Tea	Wine			Escondido
CAC	009	180	164.581	9.3	367.344	79.2	446.544	180	6	150	3	2	0.3			24	3			24	0.3				CAC	009	14	B	M		Tap Water	Brita	All Types		Coffee, Tea		Milk, Soda
AZC	010	64	11.6364	11	30.72	68	98.72	64	2	0	4	0	5							14	3	13	2		AZC	010	2	B	M		SRP Tap	Filtered	Great Value				Sprite	Tropicana
UIL	011	234	93.6	5	112.32	24	136.32	234	2	0	2	0	1			24	1								UIL	011	2	B	MO		Tap Water	Aquafina	Dunkin Do		Coffee
CAC	012	540	37.8261	5.75	52.2	58.8	111	15	5.5	540	0.25					24	2			18	0.5	18	0.1		CAC	012	2	B	MO		Filtered	Cooking			Coffee		Tejava	Star Tea
AZC	013	245	0	8	0	0	0	0	8																AZC	013	3	B	SEV		Bottled
AZC	014	246	63	8	120.96	0	120.96	246	2	2	6														AZC	014	2	B	MO		Tap Water	Purified
AZC	15.1	91	11.6154	13	36.24	76	112.24	91	1	0	6	10	6							8	6	14	2		AZC	15.1	3	B	MO		Water Soft	RO Filtered	Dasani				Gatorade	Dr. Pepper	3 Children
AZC	15.2	91	11.6154	13	36.24	76	112.24	91	1	0	6	10	6							8	6	14	2		AZC	15.2	8	B	MO		Water Soft	RO Filtered	Dasani				Gatorade	Dr. Pepper
AZC	15.3	91	11.6154	13	36.24	76	112.24	91	1	0	6	10	6							8	6	14	2		AZC	15.3	12	G	MO		Water Soft	RO Filtered	Dasani				Gatorade	Dr. Pepper
AZC	016	245	0.25	12	0.72	0	0.72	1	3	0	3	0	3	0	3										AZC	016	3	G	MO		Sparklets	Molinito	Fry's	Food City					From Letter
UGA	017	11	8.5	12	24.48	0	24.48	11	2	0	5	16	5												UGA	017	5	B	MO		Tap Water	Kroger	Nestle
CAC	018	210	35.8333	12	103.2	90	193.2	1	8	210	2	1	2			18	5								CAC	018	2	B	M		Filter Station	Cook Tap	Crystal Geyser		Tea, Coffee
CAC	019	186	66.7273	11	176.16	56	232.16	186	1	131	4	10	2	1	4					14	2	14	2		CAC	019	4	G	M		Tap Water	Pur Filter	Dasani	Crystal Geyser			Ginger Ale	Club Soda
CAC	020	118	51.3333	9	110.88	60	170.88	43	8	118	1					24	1			18	2				CAC	020	7	G	M		Arrowhead	Tap Water			Coffee		Rasp Tea
CAL	021	27	22.5556	9	48.72	482	530.72	27	4	39	2	8	2	1	1	18	1			29	16				CAL	021	3	B	MS		Tap Water	Arrowhead	Dasani+Life	Crystal Geyser	Tea		Diet Coke		16 Diet Coke
HPA	022	47	25.1667	12	72.48	129	201.48	47	4	42	2	5	6			24	1			27	3	24	1		HPA	022	3	G	MO		Tap Water	Well Water	Deer Park		Coffee		Soda, Propel	Milk
UAR	23.1	45	29	7	48.72	28	76.72	45	3	45	1	10	2	3	1					14	2				UAR	23.1	2	B	MS		Kitchen	Bathroom	Dasani	Ozarka			Dr. Pepper
UAR	23.2	45	29	7	48.72	28	76.72	45	3	45	1	10	2	3	1					14	2				UAR	23.2	2	B	MS		Kitchen	Bathroom	Dasani	Ozarka			Dr. Pepper
LLA	024	2	5.97351	15.1	21.648	294	315.648	2	0.1	6	15									29	7	13	7		LLA	024	7	G	M		Tap Water	Bottled Mix					Coke	Juicy Juice
HMA	025	5	5.45536	5.6	7.332	33.57	40.902	5	5	3	0.1	16	0.25	5	0.25	24	1			29	0.33				HMA	025	2	G	MO		Kitchen	Bathroom	Nestle	Poland Sp	Coffee		Soda
LLA	026	11	10.5652	11.5	29.16	72	101.16	10	7	11	1.5	16	2	3	1					29	2	14	1		LLA	026	2	B	MO		Filtered Tap	Tap Water	Nestle	Ozarka			Coke	Sprite
LIA	027	61	44.8462	6.5	69.96	45	114.96	61	3.5	62	1	0	1	16	1					14	1.5	24	1		LIA	027	4	B	MO		Tap Water	Parents	Aquafina	Nestle			Cherry Soda	Milk
XIA	028	112	110.049	4.1	108.288	61	169.288	110	4	112	0.1									24	2	13	1		XIA	028	NA	NA	NA		Fridge	Tap Water					Milk	Orange J	No Autism
HOR	029	2	2	8	3.84	108	111.84	2	4	2	4					20	3			24	2				HOR	029	5	B	MO		Tap Water	Well Water			Tea, Coffee		Raw Milk
LOK	030	2	3.5	8	6.72	189	195.72	2	4	5	4					20	3			29	3	14	3		LOK	030	4	G	MO		Tap Water	Bottled Mix			Tea, Coffee		Coke	Dr. Pepper
HMA	031	32	29.6	5	35.52	66	101.52	32	3	47	1	5	1			21	2			0	1	24	1		HMA	031	4	B	M		Tap Water	Acadia Sp	Poland Sp		Tea, Coffee		Polar Selzter	Milk
LNM	032	360	280.5	6	403.92	48	451.92	321	3	360	2	0	0.5	0	0.5	24	2								LNM	032	5	G	M		Fridge	Tap Water	Walmart	Kroger	Coffee
CAC	033	305	62	7	104.16	58	162.16	305	1	43	3	0	3							29	1	29	1		CAC	033	3	B	MO		Tap Water	Arrowhead	Aquafina				Pepsi	Coke
UNY	34.1	16	8.33333	6	12	90	102	0	2	16	2	9	2			21	2			24	2				UNY	34.1	8	B	M		Purified	Tap Water	PurAqua		Coffee, Tea		Milk
UNY	34.2	16	8.33333	6	12	90	102	0	2	16	2	9	2			21	2			24	2				UNY	34.2	9	B	MO		Purified	Tap Water	PurAqua		Coffee, Tea		Milk
LOK	035	29	20.0385	13	62.52	55	117.52	29	7	23	2.5	0	3.5			18	1.5			14	1	14	1		LOK	035	3	B	MO		Tap Water	Filtered	Smart Water		Tea		Root Beer	Sprite
AZC	036	238	17.2	7.5	30.96	156	186.96	238	0.5	0	4	10	1	0	2	24	2			18	6				AZC	036	3	G	SEV		Tap Water	Kroger	Dasani	Starbucks	Coffee		Tea
HPA	037	72	71.6667	6	103.2	174	277.2	72	4	71	2									29	6				HPA	037	11	B	M		Filter Well	Raw Well					Diet Pepsi
UCA	038	72	19.2941	8.5	39.36	0	39.36	72	0.5	16	8														UCA	038	5	B	MS		Tap Water	Pure Life
LMS	039	2	1	16	3.84	66	69.84	0	8	2	8					22	3								LMS	039	5	B	M		Tap Water	Tap Water			Coffee, Tea
LKS	040	89	17.8571	7	30	0	30	89	1	1	4	16	2												LKS	040	16	B	MO		Tap Water	Great Value	Nestle
AZC	041	230	66.4615	13	207.36	96.5	303.86	15	6	230	3	0	2	42	2	24	2			13	1.5	29	1		AZC	041	3	G	MO		Filter Sink	Refrigerator	Fry's	Arrowhead	Coffee		Orange J	Coke
XMN	042	36	35	12	100.8	180	280.8	34	6	36	6					18	10								XMN	042	2	B	M		Tap Water	Fountain			Tea				No Consent
LCO	043	17	17	9	36.72	60	96.72	17	9											24	2.5				LCO	043	4	G	SEV		Tap Water						Milk
HPA	044	2	2	12	5.76	208	213.76	2	4	2	8					21	7			13	1	24	2		HPA	044	2	B	M		Brita Filter	Well Water			Coffee, Tea		Orange J	Milk
LIA	045	34	21.5	8	41.28	72	113.28	34	5	2	1	0	2							29	2	14	1		LIA	045	5	B	M		Tap Water	Work Wat	Hy-Vee				Coke	Lemonade
LOK	046	6	3.70588	17	15.12	36	51.12	6	8	1	6	3	3			18	2								LOK	046	5	G	MO		Tap Water	Filtered	Ozarka		Tea
LCO	047	54	35.7143	17.5	150	58.25	208.25	17	8	92	5	10	2.5	2	2	21	2			13	1.25				LCO	047	7	B	MO		Home Tap	Work Tap	Dasani	Fiji	Coffee, Tea		Orange J
HMN	048	52	17.3333	24	99.84	0	99.84	52	8	0	8	0	8												HMN	048	2	B	MO		Well Water	RO Filtered	Smart Water
XCO	049	40	33.6957	11.5	93	48	141	40	9	11	2.5					24	2								XCO	049	NA	NA	NA		PUR Tap	PRIMO jug			Coffee				No Autism
LKS	050	40	32.125	8	61.68	0	61.68	40	3	39	3	10	2												LKS	050	4	G	M		Sink Tap	Fridge Filter	Dasani
HCT	051	44	44	5	52.8	88.5	141.3	44	5							18	2.5			29	1.5				HCT	051	3	B	SEV		Tap Water				Tea		Diet Pepsi
CAC	052	169	40.8889	9	88.32	49	137.32	169	2	211	0	0	4	10	3	18	2			13	1				CAC	052	6	B	M		Tap Water	Unknown	Kroger	Niagra	Tea		Juice
HIN	053	56	49	12	141.12	102.8	243.92	49	3	63	7	0	2			24	3.2			13	1.5	13	0.5		HIN	053	3	G	M		Sink Tap	Fridge Filter
HME	054	28	19	8	36.48	48	84.48	28	4	29	0	10	4							24	2				HME	054	13	B	M		Tap Water	Repeat	Work Est				Milk
AZC	55.1	26	22	17	89.76	113	202.76	26	12	13	4	10	1			21	4			29	1				AZC	55.1	16	B	M		Well Water	Mom's	Dasani		Coffee, Tea		Cola
AZC	55.2	26	22	17	89.76	113	202.76	26	12	13	4	10	1			21	4			29	1				AZC	55.2	18	B	M		Well Water	Mom's	Dasani		Coffee, Tea		Cola
LMS	056	0	0.333333	6	0.48	18	18.48	0	4	1	2					18	1								LMS	056	15	B	MO		Tap Water	Kentwood			Tea
LOK	057	117	63.5882	8.5	129.72	84	213.72	117	0.5	118	4	0	2	5	2	21	4								LOK	057	10	B	MO		Tap Water	Fridge Filter	Sam's Ch	Niagra	Coffee, Tea
HCT	058	45	39	7	65.52	54	119.52	45	4	44	2	5	1							36	1	18	1		HCT	058	2	B	MO		Home Tap	Other Tap	Poland Sp				Grape Soda	CL Tea
HIN	059	65	35	16	134.4	66	200.4	65	8	0	4	10	4			22	3								HIN	059	NA	B	M		Tap Water	Aquafina	Dasani		Coffee, Tea
HMN	060	18	13.7143	3.5	11.52	4.2	15.72	13	3	18	0.5					18	0.1			24	0.1				HMN	060	3	G	MS		Ice Mountain	Tap Water			Tea		Milk
HOR	061	3	1	14	3.36	28	31.36	0	6	3	4	0	2	1	2					14	2				HOR	061	16	B	M		Tap Water	Alt Tap	Aquafina	EartH2O			Dr. Pepper
HMA	062	0	3	5	3.6	35.75	39.35	0	2	0	0	5	3			24	1	47	0.25						HMA	062	14	G	M		Tap Water	Repeat	Poland Sp		Coffee	Beer
XAK	063	0	0	1	0	0	0		1																XAK	063													Miss Forms
LMT	064	384	68.7059	8.5	140.16	79.5	219.66	0	6	384	1.5	0	0.5	16	0.5					24	2.5	13	1.5		LMT	064	6	G	M		Culligan	Well Water	Generic	Nestle			Milk	Juice, soda
HPA	065	31	30.5	6	43.92	42	85.92	30	3	31	3									29	1	13	1		HPA	065	3	B	MO		Primary	Secondary					Diet Pepsi	Orange J
HOR	066	14	13.0588	17	53.28	24	77.28	13	16	14	1					24	1								HOR	066	6	B	MO		Brita Filter	Tap Water			Coffee
HOR	067	3	2.45	10	5.88	79.5	85.38	3	6.5	2	2.5	0	0.5	0	0.5	24	1.5			29	1.5				HOR	067	6	B	MO		Tap Water	Fred Mayer	FM Purified	Winco	Coffee		Cola
LIA	068	50	49	11	129.36	145	274.36	48	5.5	50	5.5					21	4			24	2	13	1		LIA	068	2	B	MO		Tap Water	Tap Water			Coffee, Tea		Milk	Orange J
LNM	69.1	104	68.4444	18	295.68	14.5	310.18	24	8	104	10									29	0.5				LNM	69.1	7	B	M		Tap Water	Well Water					Coke
LNM	69.2	104	68.4444	18	295.68	14.5	310.18	24	8	104	10									29	0.5				LNM	69.2	8	B	MO		Tap Water	Well Water					Coke
AZC	070	170	123.5	16	474.24	66	540.24	162	8	170	4	0	4			22	3								AZC	070	4	B	M		Tap Water	Fridge Filter	Generic		Coffee, Tea
XME	071	8	8	4	7.68	376	383.68	8	4									47	8						XME	071	8	G	MO		Well Water	Broken Vial				Beer			Adopted
UWV	072	13	13	8	24.96	105	129.96	13	8	13	0					18	2.5			24	2.5				UWV	072	6	B	M		Filter Well	Well Water			Tea		Milk
HMN	073	40	9.5	8	18.24	92.5	110.74	40	1	33	1	0	3	1	3	24	2.5			13	2.5				HMN	073	6	B	MO		Tap Water	Tap Water	Generic	Vitamin W	Coffee		Lemonade
CAC	074	139	82.4	5	98.88	50	148.88	132	1	139	2	1	2							24	1	13	2		CAC	074	9	B	M		Tap Water	Filtered	Crystal Geyser				Milk	Apple Juice
CAC	075	170	86.6154	6.5	135.12	86	221.12	170	2.5	40	2	42	1	16	1	18	2			14	1.5	29	1		CAC	075	3	B	MS		Tap Water	Bottled	Arrowhead	Nestle	Tea		Fanta Soda	Coke
LMT	076	3	2.61538	13	8.16	48	56.16	3	10	2	2	0	1			24	2								LMT	076	9	B	MO		Well Water	Well Water	Smart Water		Coffee
AZC	077	16	12.7143	7	21.36	57.5	78.86	14	3	16	2	13	1	2	1	18	2			14	0.5	29	0.5		AZC	077	3	B	SEV		Tap Water	Filtered	Evian	Fiji	Tea		Mount Dew	Coke
XAZ	078	236	236	7	396.48	14.5	410.98	236	7											29	0.5				XAZ	078	2	B	SEV		Filtered Tap	Tap Water					Coke		Move Maine
XAZ	079	248	248	7	416.64	36	452.64	248	7	242	0					18	2								XAZ	079	4	B	MO		Tap Water	Tap Water			Tea				Down Syn
LMT	080	665	180.5	8	346.56	48	394.56	665	2	19	6					24	2								LMT	080	3	G	M		Well Water	Albertson's			Coffee
HPA	081	17	11.25	6	16.2	85	101.2	17	3.5	2	1.5	5	1			24	1			24	2	13	1		HPA	081	6	B	MS		Well Water	Nature's Spring	Deer Park		Coffee		Milk	Orange J
LMS	082	1	0.5	12	1.44	87	88.44	1	6	0	6					18	1.5			24	2.5				LMS	082	3	B	SEV		Tap Water	Tap Water			Tea		Milk
LCO	083	27	26.1111	9	56.4	49	105.4	27	5	25	4					18	2			13	1				LCO	083	17	B	MO		Tap Water	Brita Pitcher			Tea		Juice
AZC	084	82	46.8	17.5	196.56	58.6	255.16	82	9	81	1	0	5	0	2.5	18	1.3			29	0.8	24	0.5		AZC	084	2.5	B	MO		Tap Water	Bathroom	Walmart	Bashas	Tea		Coke	Coffee
CAC	085	111	0	11	0	88.5	88.5	0	7.5	0	3.5					22	3			13	1.5	2	1.5		CAC	085	4.5	B	M		Alkaline pH	Distilled			Coffee, Tea		Orange J	VitaCoco	No Tap Wat
AZC	86.1	220	50.7692	6.5	79.2	220	299.2	220	1.5	0	5					18	2			24	4	22	4		AZC	86.1	1.5	B	M		Tap Water	Circle K			Tea		Milk	Soda
AZC	86.2	220	50.7692	6.5	79.2	220	299.2	220	1.5	0	5					18	2			24	4	22	4		AZC	86.2	2.5	B	MO		Tap Water	Circle K			Tea		Milk	Soda

## Sheet: All of USA
		Autism Data Chart (All of USA)
	S1-S4 are water sample sulfate values in mg/l									Coff, Beer, Liq7 and Liq8 are beverage values in mg/serving																Xyy is a rejected data line
	G1-G4 are water sample 8 oz glasses per day									G5 thru G8 are beverage servings (glasses)																Uyy is from USA at large
	GT4 = G1+G2+G3+G4									Water sulfate in mg: WatMg = (0.24g/glass)*WatAv*GT4																Hyy is a high incidence state
	WatAv is average water sulfate weighted by glasses									Beverage sulfate in mg: BevMg = B5G5+B6G6+B7G7+B8G8																Lyy is a low incidence state
	WatAv = (S1G1+S2G2+S3G3+S4G4) / GT4									AZC means Phoenix and Tucson canal zone at ~245 mg/l																AZC is Arizonal canal zone
	Degree = M (mild), MO (mod), MS (mod/sev), SEV (severe)									CAC is California coast 60-400 mg/l while CAL is 0-59 mg/l																CAC and CAL are SoCal coast
Zone	Key	Tap	WatAv	GT4	WatMg	BevMg	TotMg	S1	G1	S2	G2	S3	G3	S4	G4	Coff	G5	Beer	G6	Liq7	G7	Liq8	G8		Zone	Key	Age	Sex	Deg		Sample 1	Sample 2	Brand 3	Brand 4	Coffee 5	B 6	Liquid 7	Liquid 8	Notes
AZC	007	176	53.8462	13	168	199	367	19	8	176	3	10	2			18	5			24	4	13	1		AZC	007	13	B	M		RO Filtered	Tap Water	Dasani		Tea		Milk	Juice Citrus
AZC	010	64	11.6364	11	30.72	68	98.72	64	2	0	4	0	5							14	3	13	2		AZC	010	2	B	M		SRP Tap	Filtered	Great Value				Sprite	Tropicana
AZC	55.1	26	22	17	89.76	113	202.76	26	12	13	4	10	1			21	4			29	1				AZC	55.1	16	B	M		Well Water	Mom's	Dasani		Coffee, Tea		Cola
AZC	55.2	26	22	17	89.76	113	202.76	26	12	13	4	10	1			21	4			29	1				AZC	55.2	18	B	M		Well Water	Mom's	Dasani		Coffee, Tea		Cola
AZC	070	170	123.5	16	474.24	66	540.24	162	8	170	4	0	4			22	3								AZC	070	4	B	M		Tap Water	Fridge Filter	Generic		Coffee, Tea
AZC	86.1	220	50.7692	6.5	79.2	220	299.2	220	1.5	0	5					18	2			24	4	22	4		AZC	86.1	1.5	B	M		Tap Water	Circle K			Tea		Milk	Soda
AZC	014	246	63	8	120.96	0	120.96	246	2	2	6														AZC	014	2	B	MO		Tap Water	Purified
AZC	15.1	91	11.6154	13	36.24	76	112.24	91	1	0	6	10	6							8	6	14	2		AZC	15.1	3	B	MO		Water Soft	RO Filtered	Dasani				Gatorade	Dr. Pepper	3 Children
AZC	15.2	91	11.6154	13	36.24	76	112.24	91	1	0	6	10	6							8	6	14	2		AZC	15.2	8	B	MO		Water Soft	RO Filtered	Dasani				Gatorade	Dr. Pepper
AZC	15.3	91	11.6154	13	36.24	76	112.24	91	1	0	6	10	6							8	6	14	2		AZC	15.3	12	G	MO		Water Soft	RO Filtered	Dasani				Gatorade	Dr. Pepper
AZC	016	245	0.25	12	0.72	0	0.72	1	3	0	3	0	3	0	3										AZC	016	3	G	MO		Sparklets	Molinito	Fry's	Food City					From Letter
AZC	041	230	66.4615	13	207.36	96.5	303.86	15	6	230	3	0	2	42	2	24	2			13	1.5	29	1		AZC	041	3	G	MO		Filter Sink	Refrigerator	Fry's	Arrowhead	Coffee		Orange J	Coke
AZC	084	82	46.8	17.5	196.56	58.6	255.16	82	9	81	1	0	5	0	2.5	18	1.3			29	0.8	24	0.5		AZC	084	2.5	B	MO		Tap Water	Bathroom	Walmart	Bashas	Tea		Coke	Coffee
AZC	86.2	220	50.7692	6.5	79.2	220	299.2	220	1.5	0	5					18	2			24	4	22	4		AZC	86.2	2.5	B	MO		Tap Water	Circle K			Tea		Milk	Soda
AZC	013	245	0	8	0	0	0	0	8																AZC	013	3	B	SEV		Bottled
AZC	036	238	17.2	7.5	30.96	156	186.96	238	0.5	0	4	10	1	0	2	24	2			18	6				AZC	036	3	G	SEV		Tap Water	Kroger	Dasani	Starbucks	Coffee		Tea
AZC	077	16	12.7143	7	21.36	57.5	78.86	14	3	16	2	13	1	2	1	18	2			14	0.5	29	0.5		AZC	077	3	B	SEV		Tap Water	Filtered	Evian	Fiji	Tea		Mount Dew	Coke
CAC	002	105	29.7273	11	78.48	72	150.48	103	2	105	1	2	8			24	2			24	1				CAC	002	8	B	M		Kitchen	Bathroom	All Types		Coffee, Tea		Milk
CAC	009	180	164.581	9.3	367.344	79.2	446.544	180	6	150	3	2	0.3			24	3			24	0.3				CAC	009	14	B	M		Tap Water	Brita	All Types		Coffee, Tea		Milk, Soda
CAC	018	210	35.8333	12	103.2	90	193.2	1	8	210	2	1	2			18	5								CAC	018	2	B	M		Filter Station	Cook Tap	Crystal Geyser		Tea, Coffee
CAC	019	186	66.7273	11	176.16	56	232.16	186	1	131	4	10	2	1	4					14	2	14	2		CAC	019	4	G	M		Tap Water	Pur Filter	Dasani	Crystal Geyser			Ginger Ale	Club Soda
CAC	020	118	51.3333	9	110.88	60	170.88	43	8	118	1					24	1			18	2				CAC	020	7	G	M		Arrowhead	Tap Water			Coffee		Rasp Tea
CAC	052	169	40.8889	9	88.32	49	137.32	169	2	211	0	0	4	10	3	18	2			13	1				CAC	052	6	B	M		Tap Water	Unknown	Kroger	Niagra	Tea		Juice
CAC	074	139	82.4	5	98.88	50	148.88	132	1	139	2	1	2							24	1	13	2		CAC	074	9	B	M		Tap Water	Filtered	Crystal Geyser				Milk	Apple Juice
CAC	085	111	0	11	0	88.5	88.5	0	7.5	0	3.5					22	3			13	1.5	2	1.5		CAC	085	4.5	B	M		Alkaline pH	Distilled			Coffee, Tea		Orange J	VitaCoco	No Tap Wat
CAC	012	540	37.8261	5.75	52.2	58.8	111	15	5.5	540	0.25					24	2			18	0.5	18	0.1		CAC	012	2	B	MO		Filtered	Cooking			Coffee		Tejava	Star Tea
CAC	033	305	62	7	104.16	58	162.16	305	1	43	3	0	3							29	1	29	1		CAC	033	3	B	MO		Tap Water	Arrowhead	Aquafina				Pepsi	Coke
CAC	075	170	86.6154	6.5	135.12	86	221.12	170	2.5	40	2	42	1	16	1	18	2			14	1.5	29	1		CAC	075	3	B	MS		Tap Water	Bottled	Arrowhead	Nestle	Tea		Fanta Soda	Coke
CAC	005	69	1	13	3.12	81	84.12	2	6.5	0	6.5					18	4.5								CAC	005	3	B	SEV		Purified	Sparklets			Tea
CAL	006	37	13.6667	12	39.36	24	63.36	2	8	37	4					24	1								CAL	006	2	B	MO		Ralphs	Tap Water			Coffee
CAL	021	27	22.5556	9	48.72	482	530.72	27	4	39	2	8	2	1	1	18	1			29	16				CAL	021	3	B	MS		Tap Water	Arrowhead	Dasani+Life	Crystal Geyser	Tea		Diet Coke		16 Diet Coke
CAL	008	4	1.6	20	7.68	129	136.68	1	8	4	6	0	3	0	3	18	4	57	1						CAL	008	2	B	SEV		Palomar	Tap Water	Kirkland	Smart	Tea	Wine			Escondido
HCT	058	45	39	7	65.52	54	119.52	45	4	44	2	5	1							36	1	18	1		HCT	058	2	B	MO		Home Tap	Other Tap	Poland Sp				Grape Soda	CL Tea
HCT	051	44	44	5	52.8	88.5	141.3	44	5							18	2.5			29	1.5				HCT	051	3	B	SEV		Tap Water				Tea		Diet Pepsi
HIN	053	56	49	12	141.12	102.8	243.92	49	3	63	7	0	2			24	3.2			13	1.5	13	0.5		HIN	053	3	G	M		Sink Tap	Fridge Filter
HIN	059	65	35	16	134.4	66	200.4	65	8	0	4	10	4			22	3								HIN	059	NA	B	M		Tap Water	Aquafina	Dasani		Coffee, Tea
HMA	031	32	29.6	5	35.52	66	101.52	32	3	47	1	5	1			21	2			0	1	24	1		HMA	031	4	B	M		Tap Water	Acadia Sp	Poland Sp		Tea, Coffee		Polar Selzter	Milk
HMA	062	0	3	5	3.6	35.75	39.35	0	2	0	0	5	3			24	1	47	0.25						HMA	062	14	G	M		Tap Water	Repeat	Poland Sp		Coffee	Beer
HMA	025	5	5.45536	5.6	7.332	33.57	40.902	5	5	3	0.1	16	0.25	5	0.25	24	1			29	0.33				HMA	025	2	G	MO		Kitchen	Bathroom	Nestle	Poland Sp	Coffee		Soda
HME	3.1	1	0.857143	7	1.44	48	49.44	1	3	1	3	0	1			24	2								HME	3.1	13	G	M		Tap Water	Brita	Aquafina		Coffee
HME	054	28	19	8	36.48	48	84.48	28	4	29	0	10	4							24	2				HME	054	13	B	M		Tap Water	Repeat	Work Est				Milk
HME	3.2	1	0.857143	7	1.44	48	49.44	1	3	1	3	0	1			24	2								HME	3.2	15	B	SEV		Tap Water	Brita	Aquafina		Coffee
HMN	048	52	17.3333	24	99.84	0	99.84	52	8	0	8	0	8												HMN	048	2	B	MO		Well Water	RO Filtered	Smart Water
HMN	073	40	9.5	8	18.24	92.5	110.74	40	1	33	1	0	3	1	3	24	2.5			13	2.5				HMN	073	6	B	MO		Tap Water	Tap Water	Generic	Vitamin W	Coffee		Lemonade
HMN	060	18	13.7143	3.5	11.52	4.2	15.72	13	3	18	0.5					18	0.1			24	0.1				HMN	060	3	G	MS		Ice Mountain	Tap Water			Tea		Milk
HOR	061	3	1	14	3.36	28	31.36	0	6	3	4	0	2	1	2					14	2				HOR	061	16	B	M		Tap Water	Alt Tap	Aquafina	EartH2O			Dr. Pepper
HOR	029	2	2	8	3.84	108	111.84	2	4	2	4					20	3			24	2				HOR	029	5	B	MO		Tap Water	Well Water			Tea, Coffee		Raw Milk
HOR	066	14	13.0588	17	53.28	24	77.28	13	16	14	1					24	1								HOR	066	6	B	MO		Brita Filter	Tap Water			Coffee
HOR	067	3	2.45	10	5.88	79.5	85.38	3	6.5	2	2.5	0	0.5	0	0.5	24	1.5			29	1.5				HOR	067	6	B	MO		Tap Water	Fred Mayer	FM Purified	Winco	Coffee		Cola
HPA	037	72	71.6667	6	103.2	174	277.2	72	4	71	2									29	6				HPA	037	11	B	M		Filter Well	Raw Well					Diet Pepsi
HPA	044	2	2	12	5.76	208	213.76	2	4	2	8					21	7			13	1	24	2		HPA	044	2	B	M		Brita Filter	Well Water			Coffee, Tea		Orange J	Milk
HPA	022	47	25.1667	12	72.48	129	201.48	47	4	42	2	5	6			24	1			27	3	24	1		HPA	022	3	G	MO		Tap Water	Well Water	Deer Park		Coffee		Soda, Propel	Milk
HPA	065	31	30.5	6	43.92	42	85.92	30	3	31	3									29	1	13	1		HPA	065	3	B	MO		Primary	Secondary					Diet Pepsi	Orange J
HPA	081	17	11.25	6	16.2	85	101.2	17	3.5	2	1.5	5	1			24	1			24	2	13	1		HPA	081	6	B	MS		Well Water	Nature's Spring	Deer Park		Coffee		Milk	Orange J
LCO	047	54	35.7143	17.5	150	58.25	208.25	17	8	92	5	10	2.5	2	2	21	2			13	1.25				LCO	047	7	B	MO		Home Tap	Work Tap	Dasani	Fiji	Coffee, Tea		Orange J
LCO	083	27	26.1111	9	56.4	49	105.4	27	5	25	4					18	2			13	1				LCO	083	17	B	MO		Tap Water	Brita Pitcher			Tea		Juice
LCO	043	17	17	9	36.72	60	96.72	17	9											24	2.5				LCO	043	4	G	SEV		Tap Water						Milk
LIA	045	34	21.5	8	41.28	72	113.28	34	5	2	1	0	2							29	2	14	1		LIA	045	5	B	M		Tap Water	Work Wat	Hy-Vee				Coke	Lemonade
LIA	027	61	44.8462	6.5	69.96	45	114.96	61	3.5	62	1	0	1	16	1					14	1.5	24	1		LIA	027	4	B	MO		Tap Water	Parents	Aquafina	Nestle			Cherry Soda	Milk
LIA	068	50	49	11	129.36	145	274.36	48	5.5	50	5.5					21	4			24	2	13	1		LIA	068	2	B	MO		Tap Water	Tap Water			Coffee, Tea		Milk	Orange J
LKS	050	40	32.125	8	61.68	0	61.68	40	3	39	3	10	2												LKS	050	4	G	M		Sink Tap	Fridge Filter	Dasani
LKS	040	89	17.8571	7	30	0	30	89	1	1	4	16	2												LKS	040	16	B	MO		Tap Water	Great Value	Nestle
LLA	024	2	5.97351	15.1	21.648	294	315.648	2	0.1	6	15									29	7	13	7		LLA	024	7	G	M		Tap Water	Bottled Mix					Coke	Juicy Juice
LLA	026	11	10.5652	11.5	29.16	72	101.16	10	7	11	1.5	16	2	3	1					29	2	14	1		LLA	026	2	B	MO		Filtered Tap	Tap Water	Nestle	Ozarka			Coke	Sprite
LMS	039	2	1	16	3.84	66	69.84	0	8	2	8					22	3								LMS	039	5	B	M		Tap Water	Tap Water			Coffee, Tea
LMS	056	0	0.333333	6	0.48	18	18.48	0	4	1	2					18	1								LMS	056	15	B	MO		Tap Water	Kentwood			Tea
LMS	082	1	0.5	12	1.44	87	88.44	1	6	0	6					18	1.5			24	2.5				LMS	082	3	B	SEV		Tap Water	Tap Water			Tea		Milk
LMT	064	384	68.7059	8.5	140.16	79.5	219.66	0	6	384	1.5	0	0.5	16	0.5					24	2.5	13	1.5		LMT	064	6	G	M		Culligan	Well Water	Generic	Nestle			Milk	Juice, soda
LMT	080	665	180.5	8	346.56	48	394.56	665	2	19	6					24	2								LMT	080	3	G	M		Well Water	Albertson's			Coffee
LMT	076	3	2.61538	13	8.16	48	56.16	3	10	2	2	0	1			24	2								LMT	076	9	B	MO		Well Water	Well Water	Smart Water		Coffee
LNM	032	360	280.5	6	403.92	48	451.92	321	3	360	2	0	0.5	0	0.5	24	2								LNM	032	5	G	M		Fridge	Tap Water	Walmart	Kroger	Coffee
LNM	69.1	104	68.4444	18	295.68	14.5	310.18	24	8	104	10									29	0.5				LNM	69.1	7	B	M		Tap Water	Well Water					Coke
LNM	69.2	104	68.4444	18	295.68	14.5	310.18	24	8	104	10									29	0.5				LNM	69.2	8	B	MO		Tap Water	Well Water					Coke
LOK	030	2	3.5	8	6.72	189	195.72	2	4	5	4					20	3			29	3	14	3		LOK	030	4	G	MO		Tap Water	Bottled Mix			Tea, Coffee		Coke	Dr. Pepper
LOK	035	29	20.0385	13	62.52	55	117.52	29	7	23	2.5	0	3.5			18	1.5			14	1	14	1		LOK	035	3	B	MO		Tap Water	Filtered	Smart Water		Tea		Root Beer	Sprite
LOK	046	6	3.70588	17	15.12	36	51.12	6	8	1	6	3	3			18	2								LOK	046	5	G	MO		Tap Water	Filtered	Ozarka		Tea
LOK	057	117	63.5882	8.5	129.72	84	213.72	117	0.5	118	4	0	2	5	2	21	4								LOK	057	10	B	MO		Tap Water	Fridge Filter	Sam's Ch	Niagra	Coffee, Tea
UAR	23.1	45	29	7	48.72	28	76.72	45	3	45	1	10	2	3	1					14	2				UAR	23.1	2	B	MS		Kitchen	Bathroom	Dasani	Ozarka			Dr. Pepper
UAR	23.2	45	29	7	48.72	28	76.72	45	3	45	1	10	2	3	1					14	2				UAR	23.2	2	B	MS		Kitchen	Bathroom	Dasani	Ozarka			Dr. Pepper
UCA	001	2	0.206897	14.5	0.72	312	312.72	0	13	2	1.5					24	13								UCA	001	5	B	MO		Ref Filter	Raw Tap			Coffee				13 Coffee
UCA	038	72	19.2941	8.5	39.36	0	39.36	72	0.5	16	8														UCA	038	5	B	MS		Tap Water	Pure Life
UGA	017	11	8.5	12	24.48	0	24.48	11	2	0	5	16	5												UGA	017	5	B	MO		Tap Water	Kroger	Nestle
UIL	011	234	93.6	5	112.32	24	136.32	234	2	0	2	0	1			24	1								UIL	011	2	B	MO		Tap Water	Aquafina	Dunkin Do		Coffee
UNY	34.1	16	8.33333	6	12	90	102	0	2	16	2	9	2			21	2			24	2				UNY	34.1	8	B	M		Purified	Tap Water	PurAqua		Coffee, Tea		Milk
UNY	34.2	16	8.33333	6	12	90	102	0	2	16	2	9	2			21	2			24	2				UNY	34.2	9	B	MO		Purified	Tap Water	PurAqua		Coffee, Tea		Milk
UWV	072	13	13	8	24.96	105	129.96	13	8	13	0					18	2.5			24	2.5				UWV	072	6	B	M		Filter Well	Well Water			Tea		Milk
Mean		93.5	34.0674	86	77.7652	80.0427	157.808
All		Tap	WatAv	Num	WatMg	BevMg	TotMg
Sdev		119.645	43.3743		95.0288	75.3336	116.393
XAK	063	0	0	1	0	0	0		1																XAK	063													Miss Forms
XAZ	079	248	248	7	416.64	36	452.64	248	7	242	0					18	2								XAZ	079	4	B	MO		Tap Water	Tap Water			Tea				Down Syn
XAZ	078	236	236	7	396.48	14.5	410.98	236	7											29	0.5				XAZ	078	2	B	SEV		Filtered Tap	Tap Water					Coke		Move Maine
XCO	049	40	33.6957	11.5	93	48	141	40	9	11	2.5					24	2								XCO	049	NA	NA	NA		PUR Tap	PRIMO jug			Coffee				No Autism
XIA	028	112	110.049	4.1	108.288	61	169.288	110	4	112	0.1									24	2	13	1		XIA	028	NA	NA	NA		Fridge	Tap Water					Milk	Orange J	No Autism
XME	071	8	8	4	7.68	376	383.68	8	4									47	8						XME	071	8	G	MO		Well Water	Broken Vial				Beer			Adopted
XMN	042	36	35	12	100.8	180	280.8	34	6	36	6					18	10								XMN	042	2	B	M		Tap Water	Fountain			Tea				No Consent
XWA	004	258	88.5556	9	191.28	24	215.28	258	3	1	3	10	2	0	1	24	1								XWA	004	3	B	SEV		WA Tap	Glacier	VitaCoco	Starbucks	Coffee				Suspect
Rejects
AZC	007	176	53.8462	13	168	199	367	19	8	176	3	10	2			18	5			24	4	13	1		AZC	007	13	B	M		RO Filtered	Tap Water	Dasani		Tea		Milk	Juice Citrus
AZC	010	64	11.6364	11	30.72	68	98.72	64	2	0	4	0	5							14	3	13	2		AZC	010	2	B	M		SRP Tap	Filtered	Great Value				Sprite	Tropicana
AZC	55.1	26	22	17	89.76	113	202.76	26	12	13	4	10	1			21	4			29	1				AZC	55.1	16	B	M		Well Water	Mom's	Dasani		Coffee, Tea		Cola
AZC	55.2	26	22	17	89.76	113	202.76	26	12	13	4	10	1			21	4			29	1				AZC	55.2	18	B	M		Well Water	Mom's	Dasani		Coffee, Tea		Cola
AZC	070	170	123.5	16	474.24	66	540.24	162	8	170	4	0	4			22	3								AZC	070	4	B	M		Tap Water	Fridge Filter	Generic		Coffee, Tea
AZC	86.1	220	50.7692	6.5	79.2	220	299.2	220	1.5	0	5					18	2			24	4	22	4		AZC	86.1	1.5	B	M		Tap Water	Circle K			Tea		Milk	Soda
CAC	002	105	29.7273	11	78.48	72	150.48	103	2	105	1	2	8			24	2			24	1				CAC	002	8	B	M		Kitchen	Bathroom	All Types		Coffee, Tea		Milk
CAC	009	180	164.581	9.3	367.344	79.2	446.544	180	6	150	3	2	0.3			24	3			24	0.3				CAC	009	14	B	M		Tap Water	Brita	All Types		Coffee, Tea		Milk, Soda
CAC	018	210	35.8333	12	103.2	90	193.2	1	8	210	2	1	2			18	5								CAC	018	2	B	M		Filter Station	Cook Tap	Crystal Geyser		Tea, Coffee
CAC	019	186	66.7273	11	176.16	56	232.16	186	1	131	4	10	2	1	4					14	2	14	2		CAC	019	4	G	M		Tap Water	Pur Filter	Dasani	Crystal Geyser			Ginger Ale	Club Soda
CAC	020	118	51.3333	9	110.88	60	170.88	43	8	118	1					24	1			18	2				CAC	020	7	G	M		Arrowhead	Tap Water			Coffee		Rasp Tea
CAC	052	169	40.8889	9	88.32	49	137.32	169	2	211	0	0	4	10	3	18	2			13	1				CAC	052	6	B	M		Tap Water	Unknown	Kroger	Niagra	Tea		Juice
CAC	074	139	82.4	5	98.88	50	148.88	132	1	139	2	1	2							24	1	13	2		CAC	074	9	B	M		Tap Water	Filtered	Crystal Geyser				Milk	Apple Juice
CAC	085	111	0	11	0	88.5	88.5	0	7.5	0	3.5					22	3			13	1.5	2	1.5		CAC	085	4.5	B	M		Alkaline pH	Distilled			Coffee, Tea		Orange J	VitaCoco	No Tap Wat
HIN	053	56	49	12	141.12	102.8	243.92	49	3	63	7	0	2			24	3.2			13	1.5	13	0.5		HIN	053	3	G	M		Sink Tap	Fridge Filter
HIN	059	65	35	16	134.4	66	200.4	65	8	0	4	10	4			22	3								HIN	059	NA	B	M		Tap Water	Aquafina	Dasani		Coffee, Tea
HMA	031	32	29.6	5	35.52	66	101.52	32	3	47	1	5	1			21	2			0	1	24	1		HMA	031	4	B	M		Tap Water	Acadia Sp	Poland Sp		Tea, Coffee		Polar Selzter	Milk
HMA	062	0	3	5	3.6	35.75	39.35	0	2	0	0	5	3			24	1	47	0.25						HMA	062	14	G	M		Tap Water	Repeat	Poland Sp		Coffee	Beer
HME	3.1	1	0.857143	7	1.44	48	49.44	1	3	1	3	0	1			24	2								HME	3.1	13	G	M		Tap Water	Brita	Aquafina		Coffee
HME	054	28	19	8	36.48	48	84.48	28	4	29	0	10	4							24	2				HME	054	13	B	M		Tap Water	Repeat	Work Est				Milk
HOR	061	3	1	14	3.36	28	31.36	0	6	3	4	0	2	1	2					14	2				HOR	061	16	B	M		Tap Water	Alt Tap	Aquafina	EartH2O			Dr. Pepper
HPA	037	72	71.6667	6	103.2	174	277.2	72	4	71	2									29	6				HPA	037	11	B	M		Filter Well	Raw Well					Diet Pepsi
HPA	044	2	2	12	5.76	208	213.76	2	4	2	8					21	7			13	1	24	2		HPA	044	2	B	M		Brita Filter	Well Water			Coffee, Tea		Orange J	Milk
LIA	045	34	21.5	8	41.28	72	113.28	34	5	2	1	0	2							29	2	14	1		LIA	045	5	B	M		Tap Water	Work Wat	Hy-Vee				Coke	Lemonade
LKS	050	40	32.125	8	61.68	0	61.68	40	3	39	3	10	2												LKS	050	4	G	M		Sink Tap	Fridge Filter	Dasani
LLA	024	2	5.97351	15.1	21.648	294	315.648	2	0.1	6	15									29	7	13	7		LLA	024	7	G	M		Tap Water	Bottled Mix					Coke	Juicy Juice
LMS	039	2	1	16	3.84	66	69.84	0	8	2	8					22	3								LMS	039	5	B	M		Tap Water	Tap Water			Coffee, Tea
LMT	064	384	68.7059	8.5	140.16	79.5	219.66	0	6	384	1.5	0	0.5	16	0.5					24	2.5	13	1.5		LMT	064	6	G	M		Culligan	Well Water	Generic	Nestle			Milk	Juice, soda
LMT	080	665	180.5	8	346.56	48	394.56	665	2	19	6					24	2								LMT	080	3	G	M		Well Water	Albertson's			Coffee
LNM	032	360	280.5	6	403.92	48	451.92	321	3	360	2	0	0.5	0	0.5	24	2								LNM	032	5	G	M		Fridge	Tap Water	Walmart	Kroger	Coffee
LNM	69.1	104	68.4444	18	295.68	14.5	310.18	24	8	104	10									29	0.5				LNM	69.1	7	B	M		Tap Water	Well Water					Coke
UNY	34.1	16	8.33333	6	12	90	102	0	2	16	2	9	2			21	2			24	2				UNY	34.1	8	B	M		Purified	Tap Water	PurAqua		Coffee, Tea		Milk
UWV	072	13	13	8	24.96	105	129.96	13	8	13	0					18	2.5			24	2.5				UWV	072	6	B	M		Filter Well	Well Water			Tea		Milk
Mean		114.515	49.8924	33	114.289	88.4015	202.691
All Mild		Tap	WatAv	Num	WatMg	BevMg	TotMg
Sdev		139.74	60.4515		125.801	63.5868	130.027
AZC	014	246	63	8	120.96	0	120.96	246	2	2	6														AZC	014	2	B	MO		Tap Water	Purified
AZC	15.1	91	11.6154	13	36.24	76	112.24	91	1	0	6	10	6							8	6	14	2		AZC	15.1	3	B	MO		Water Soft	RO Filtered	Dasani				Gatorade	Dr. Pepper	3 Children
AZC	15.2	91	11.6154	13	36.24	76	112.24	91	1	0	6	10	6							8	6	14	2		AZC	15.2	8	B	MO		Water Soft	RO Filtered	Dasani				Gatorade	Dr. Pepper
AZC	15.3	91	11.6154	13	36.24	76	112.24	91	1	0	6	10	6							8	6	14	2		AZC	15.3	12	G	MO		Water Soft	RO Filtered	Dasani				Gatorade	Dr. Pepper
AZC	016	245	0.25	12	0.72	0	0.72	1	3	0	3	0	3	0	3										AZC	016	3	G	MO		Sparklets	Molinito	Fry's	Food City					From Letter
AZC	041	230	66.4615	13	207.36	96.5	303.86	15	6	230	3	0	2	42	2	24	2			13	1.5	29	1		AZC	041	3	G	MO		Filter Sink	Refrigerator	Fry's	Arrowhead	Coffee		Orange J	Coke
AZC	084	82	46.8	17.5	196.56	58.6	255.16	82	9	81	1	0	5	0	2.5	18	1.3			29	0.8	24	0.5		AZC	084	2.5	B	MO		Tap Water	Bathroom	Walmart	Bashas	Tea		Coke	Coffee
AZC	86.2	220	50.7692	6.5	79.2	220	299.2	220	1.5	0	5					18	2			24	4	22	4		AZC	86.2	2.5	B	MO		Tap Water	Circle K			Tea		Milk	Soda
CAC	012	540	37.8261	5.75	52.2	58.8	111	15	5.5	540	0.25					24	2			18	0.5	18	0.1		CAC	012	2	B	MO		Filtered	Cooking			Coffee		Tejava	Star Tea
CAC	033	305	62	7	104.16	58	162.16	305	1	43	3	0	3							29	1	29	1		CAC	033	3	B	MO		Tap Water	Arrowhead	Aquafina				Pepsi	Coke
CAL	006	37	13.6667	12	39.36	24	63.36	2	8	37	4					24	1								CAL	006	2	B	MO		Ralphs	Tap Water			Coffee
HCT	058	45	39	7	65.52	54	119.52	45	4	44	2	5	1							36	1	18	1		HCT	058	2	B	MO		Home Tap	Other Tap	Poland Sp				Grape Soda	CL Tea
HMA	025	5	5.45536	5.6	7.332	33.57	40.902	5	5	3	0.1	16	0.25	5	0.25	24	1			29	0.33				HMA	025	2	G	MO		Kitchen	Bathroom	Nestle	Poland Sp	Coffee		Soda
HMN	048	52	17.3333	24	99.84	0	99.84	52	8	0	8	0	8												HMN	048	2	B	MO		Well Water	RO Filtered	Smart Water
HMN	073	40	9.5	8	18.24	92.5	110.74	40	1	33	1	0	3	1	3	24	2.5			13	2.5				HMN	073	6	B	MO		Tap Water	Tap Water	Generic	Vitamin W	Coffee		Lemonade
HOR	029	2	2	8	3.84	108	111.84	2	4	2	4					20	3			24	2				HOR	029	5	B	MO		Tap Water	Well Water			Tea, Coffee		Raw Milk
HOR	066	14	13.0588	17	53.28	24	77.28	13	16	14	1					24	1								HOR	066	6	B	MO		Brita Filter	Tap Water			Coffee
HOR	067	3	2.45	10	5.88	79.5	85.38	3	6.5	2	2.5	0	0.5	0	0.5	24	1.5			29	1.5				HOR	067	6	B	MO		Tap Water	Fred Mayer	FM Purified	Winco	Coffee		Cola
HPA	022	47	25.1667	12	72.48	129	201.48	47	4	42	2	5	6			24	1			27	3	24	1		HPA	022	3	G	MO		Tap Water	Well Water	Deer Park		Coffee		Soda, Propel	Milk
HPA	065	31	30.5	6	43.92	42	85.92	30	3	31	3									29	1	13	1		HPA	065	3	B	MO		Primary	Secondary					Diet Pepsi	Orange J
LCO	047	54	35.7143	17.5	150	58.25	208.25	17	8	92	5	10	2.5	2	2	21	2			13	1.25				LCO	047	7	B	MO		Home Tap	Work Tap	Dasani	Fiji	Coffee, Tea		Orange J
LCO	083	27	26.1111	9	56.4	49	105.4	27	5	25	4					18	2			13	1				LCO	083	17	B	MO		Tap Water	Brita Pitcher			Tea		Juice
LIA	027	61	44.8462	6.5	69.96	45	114.96	61	3.5	62	1	0	1	16	1					14	1.5	24	1		LIA	027	4	B	MO		Tap Water	Parents	Aquafina	Nestle			Cherry Soda	Milk
LIA	068	50	49	11	129.36	145	274.36	48	5.5	50	5.5					21	4			24	2	13	1		LIA	068	2	B	MO		Tap Water	Tap Water			Coffee, Tea		Milk	Orange J
LKS	040	89	17.8571	7	30	0	30	89	1	1	4	16	2												LKS	040	16	B	MO		Tap Water	Great Value	Nestle
LLA	026	11	10.5652	11.5	29.16	72	101.16	10	7	11	1.5	16	2	3	1					29	2	14	1		LLA	026	2	B	MO		Filtered Tap	Tap Water	Nestle	Ozarka			Coke	Sprite
LMS	056	0	0.333333	6	0.48	18	18.48	0	4	1	2					18	1								LMS	056	15	B	MO		Tap Water	Kentwood			Tea
LMT	076	3	2.61538	13	8.16	48	56.16	3	10	2	2	0	1			24	2								LMT	076	9	B	MO		Well Water	Well Water	Smart Water		Coffee
LNM	69.2	104	68.4444	18	295.68	14.5	310.18	24	8	104	10									29	0.5				LNM	69.2	8	B	MO		Tap Water	Well Water					Coke
LOK	030	2	3.5	8	6.72	189	195.72	2	4	5	4					20	3			29	3	14	3		LOK	030	4	G	MO		Tap Water	Bottled Mix			Tea, Coffee		Coke	Dr. Pepper
LOK	035	29	20.0385	13	62.52	55	117.52	29	7	23	2.5	0	3.5			18	1.5			14	1	14	1		LOK	035	3	B	MO		Tap Water	Filtered	Smart Water		Tea		Root Beer	Sprite
LOK	046	6	3.70588	17	15.12	36	51.12	6	8	1	6	3	3			18	2								LOK	046	5	G	MO		Tap Water	Filtered	Ozarka		Tea
LOK	057	117	63.5882	8.5	129.72	84	213.72	117	0.5	118	4	0	2	5	2	21	4								LOK	057	10	B	MO		Tap Water	Fridge Filter	Sam's Ch	Niagra	Coffee, Tea
UCA	001	2	0.206897	14.5	0.72	312	312.72	0	13	2	1.5					24	13								UCA	001	5	B	MO		Ref Filter	Raw Tap			Coffee				13 Coffee
UGA	017	11	8.5	12	24.48	0	24.48	11	2	0	5	16	5												UGA	017	5	B	MO		Tap Water	Kroger	Nestle
UIL	011	234	93.6	5	112.32	24	136.32	234	2	0	2	0	1			24	1								UIL	011	2	B	MO		Tap Water	Aquafina	Dunkin Do		Coffee
UNY	34.2	16	8.33333	6	12	90	102	0	2	16	2	9	2			21	2			24	2				UNY	34.2	9	B	MO		Purified	Tap Water	PurAqua		Coffee, Tea		Milk
CAC	075	170	86.6154	6.5	135.12	86	221.12	170	2.5	40	2	42	1	16	1	18	2			14	1.5	29	1		CAC	075	3	B	MS		Tap Water	Bottled	Arrowhead	Nestle	Tea		Fanta Soda	Coke
CAL	021	27	22.5556	9	48.72	482	530.72	27	4	39	2	8	2	1	1	18	1			29	16				CAL	021	3	B	MS		Tap Water	Arrowhead	Dasani+Life	Crystal Geyser	Tea		Diet Coke		16 Diet Coke
HMN	060	18	13.7143	3.5	11.52	4.2	15.72	13	3	18	0.5					18	0.1			24	0.1				HMN	060	3	G	MS		Ice Mountain	Tap Water			Tea		Milk
HPA	081	17	11.25	6	16.2	85	101.2	17	3.5	2	1.5	5	1			24	1			24	2	13	1		HPA	081	6	B	MS		Well Water	Nature's Spring	Deer Park		Coffee		Milk	Orange J
UAR	23.1	45	29	7	48.72	28	76.72	45	3	45	1	10	2	3	1					14	2				UAR	23.1	2	B	MS		Kitchen	Bathroom	Dasani	Ozarka			Dr. Pepper
UAR	23.2	45	29	7	48.72	28	76.72	45	3	45	1	10	2	3	1					14	2				UAR	23.2	2	B	MS		Kitchen	Bathroom	Dasani	Ozarka			Dr. Pepper
UCA	038	72	19.2941	8.5	39.36	0	39.36	72	0.5	16	8														UCA	038	5	B	MS		Tap Water	Pure Life
Mean		82.4318	27.0108	44	62.7439	74.0777	136.822
All Mod		Tap	WatAv	Num	WatMg	BevMg	TotMg
Sdev		106.539	24.5184		63.1251	87.935	104.127
AZC	013	245	0	8	0	0	0	0	8																AZC	013	3	B	SEV		Bottled
AZC	036	238	17.2	7.5	30.96	156	186.96	238	0.5	0	4	10	1	0	2	24	2			18	6				AZC	036	3	G	SEV		Tap Water	Kroger	Dasani	Starbucks	Coffee		Tea
AZC	077	16	12.7143	7	21.36	57.5	78.86	14	3	16	2	13	1	2	1	18	2			14	0.5	29	0.5		AZC	077	3	B	SEV		Tap Water	Filtered	Evian	Fiji	Tea		Mount Dew	Coke
CAC	005	69	1	13	3.12	81	84.12	2	6.5	0	6.5					18	4.5								CAC	005	3	B	SEV		Purified	Sparklets			Tea
CAL	008	4	1.6	20	7.68	129	136.68	1	8	4	6	0	3	0	3	18	4	57	1						CAL	008	2	B	SEV		Palomar	Tap Water	Kirkland	Smart	Tea	Wine			Escondido
HCT	051	44	44	5	52.8	88.5	141.3	44	5							18	2.5			29	1.5				HCT	051	3	B	SEV		Tap Water				Tea		Diet Pepsi
HME	3.2	1	0.857143	7	1.44	48	49.44	1	3	1	3	0	1			24	2								HME	3.2	15	B	SEV		Tap Water	Brita	Aquafina		Coffee
LCO	043	17	17	9	36.72	60	96.72	17	9											24	2.5				LCO	043	4	G	SEV		Tap Water						Milk
LMS	082	1	0.5	12	1.44	87	88.44	1	6	0	6					18	1.5			24	2.5				LMS	082	3	B	SEV		Tap Water	Tap Water			Tea		Milk
Mean		70.5556	10.5413	9	17.28	78.5556	95.8356
All Sev		Tap	WatAv	Num	WatMg	BevMg	TotMg
Sdev		99.4524	14.5214		19.1587	45.5669	54.6087

## Sheet: SW Region
		Autism Data Chart (SW Region)
	S1-S4 are water sample sulfate values in mg/l									Coff, Beer, Liq7 and Liq8 are beverage values in mg/serving																Xyy is a rejected data line
	G1-G4 are water sample 8 oz glasses per day									G5 thru G8 are beverage servings (glasses)																Uyy is from USA at large
	GT4 = G1+G2+G3+G4									Water sulfate in mg: WatMg = (0.24g/glass)*WatAv*GT4																Hyy is a high incidence state
	WatAv is average water sulfate weighted by glasses									Beverage sulfate in mg: BevMg = B5G5+B6G6+B7G7+B8G8																Lyy is a low incidence state
	WatAv = (S1G1+S2G2+S3G3+S4G4) / GT4									AZC means Phoenix and Tucson canal zone at ~245 mg/l																AZC is Arizonal canal zone
	Degree = M (mild), MO (mod), MS (mod/sev), SEV (severe)									CAC is California coast 60-400 mg/l while CAL is 0-59 mg/l																CAC and CAL are SoCal coast
Zone	Key	Tap	WatAv	GT4	WatMg	BevMg	TotMg	S1	G1	S2	G2	S3	G3	S4	G4	Coff	G5	Beer	G6	Liq7	G7	Liq8	G8		Zone	Key	Age	Sex	Deg		Sample 1	Sample 2	Brand 3	Brand 4	Coffee 5	B 6	Liquid 7	Liquid 8	Notes
AZC	007	176	53.8462	13	168	199	367	19	8	176	3	10	2			18	5			24	4	13	1		AZC	007	13	B	M		RO Filtered	Tap Water	Dasani		Tea		Milk	Juice Citrus
AZC	010	64	11.6364	11	30.72	68	98.72	64	2	0	4	0	5							14	3	13	2		AZC	010	2	B	M		SRP Tap	Filtered	Great Value				Sprite	Tropicana
AZC	55.1	26	22	17	89.76	113	202.76	26	12	13	4	10	1			21	4			29	1				AZC	55.1	16	B	M		Well Water	Mom's	Dasani		Coffee, Tea		Cola
AZC	55.2	26	22	17	89.76	113	202.76	26	12	13	4	10	1			21	4			29	1				AZC	55.2	18	B	M		Well Water	Mom's	Dasani		Coffee, Tea		Cola
AZC	070	170	123.5	16	474.24	66	540.24	162	8	170	4	0	4			22	3								AZC	070	4	B	M		Tap Water	Fridge Filter	Generic		Coffee, Tea
AZC	86.1	220	50.7692	6.5	79.2	220	299.2	220	1.5	0	5					18	2			24	4	22	4		AZC	86.1	1.5	B	M		Tap Water	Circle K			Tea		Milk	Soda
CAC	002	105	29.7273	11	78.48	72	150.48	103	2	105	1	2	8			24	2			24	1				CAC	002	8	B	M		Kitchen	Bathroom	All Types		Coffee, Tea		Milk
CAC	009	180	164.581	9.3	367.344	79.2	446.544	180	6	150	3	2	0.3			24	3			24	0.3				CAC	009	14	B	M		Tap Water	Brita	All Types		Coffee, Tea		Milk, Soda
CAC	018	210	35.8333	12	103.2	90	193.2	1	8	210	2	1	2			18	5								CAC	018	2	B	M		Filter Station	Cook Tap	Crystal Geyser		Tea, Coffee
CAC	019	186	66.7273	11	176.16	56	232.16	186	1	131	4	10	2	1	4					14	2	14	2		CAC	019	4	G	M		Tap Water	Pur Filter	Dasani	Crystal Geyser			Ginger Ale	Club Soda
CAC	020	118	51.3333	9	110.88	60	170.88	43	8	118	1					24	1			18	2				CAC	020	7	G	M		Arrowhead	Tap Water			Coffee		Rasp Tea
CAC	052	169	40.8889	9	88.32	49	137.32	169	2	211	0	0	4	10	3	18	2			13	1				CAC	052	6	B	M		Tap Water	Unknown	Kroger	Niagra	Tea		Juice
CAC	074	139	82.4	5	98.88	50	148.88	132	1	139	2	1	2							24	1	13	2		CAC	074	9	B	M		Tap Water	Filtered	Crystal Geyser				Milk	Apple Juice
CAC	085	111	0	11	0	88.5	88.5	0	7.5	0	3.5					22	3			13	1.5	2	1.5		CAC	085	4.5	B	M		Alkaline pH	Distilled			Coffee, Tea		Orange J	VitaCoco	No Tap Wat
AZC	014	246	63	8	120.96	0	120.96	246	2	2	6														AZC	014	2	B	MO		Tap Water	Purified
AZC	15.1	91	11.6154	13	36.24	76	112.24	91	1	0	6	10	6							8	6	14	2		AZC	15.1	3	B	MO		Water Soft	RO Filtered	Dasani				Gatorade	Dr. Pepper	3 Children
AZC	15.2	91	11.6154	13	36.24	76	112.24	91	1	0	6	10	6							8	6	14	2		AZC	15.2	8	B	MO		Water Soft	RO Filtered	Dasani				Gatorade	Dr. Pepper
AZC	15.3	91	11.6154	13	36.24	76	112.24	91	1	0	6	10	6							8	6	14	2		AZC	15.3	12	G	MO		Water Soft	RO Filtered	Dasani				Gatorade	Dr. Pepper
AZC	016	245	0.25	12	0.72	0	0.72	1	3	0	3	0	3	0	3										AZC	016	3	G	MO		Sparklets	Molinito	Fry's	Food City					From Letter
AZC	041	230	66.4615	13	207.36	96.5	303.86	15	6	230	3	0	2	42	2	24	2			13	1.5	29	1		AZC	041	3	G	MO		Filter Sink	Refrigerator	Fry's	Arrowhead	Coffee		Orange J	Coke
AZC	084	82	46.8	17.5	196.56	58.6	255.16	82	9	81	1	0	5	0	2.5	18	1.3			29	0.8	24	0.5		AZC	084	2.5	B	MO		Tap Water	Bathroom	Walmart	Bashas	Tea		Coke	Coffee
AZC	86.2	220	50.7692	6.5	79.2	220	299.2	220	1.5	0	5					18	2			24	4	22	4		AZC	86.2	2.5	B	MO		Tap Water	Circle K			Tea		Milk	Soda
CAC	012	540	37.8261	5.75	52.2	58.8	111	15	5.5	540	0.25					24	2			18	0.5	18	0.1		CAC	012	2	B	MO		Filtered	Cooking			Coffee		Tejava	Star Tea
CAC	033	305	62	7	104.16	58	162.16	305	1	43	3	0	3							29	1	29	1		CAC	033	3	B	MO		Tap Water	Arrowhead	Aquafina				Pepsi	Coke
CAL	006	37	13.6667	12	39.36	24	63.36	2	8	37	4					24	1								CAL	006	2	B	MO		Ralphs	Tap Water			Coffee
CAC	075	170	86.6154	6.5	135.12	86	221.12	170	2.5	40	2	42	1	16	1	18	2			14	1.5	29	1		CAC	075	3	B	MS		Tap Water	Bottled	Arrowhead	Nestle	Tea		Fanta Soda	Coke
CAL	021	27	22.5556	9	48.72	482	530.72	27	4	39	2	8	2	1	1	18	1			29	16				CAL	021	3	B	MS		Tap Water	Arrowhead	Dasani+Life	Crystal Geyser	Tea		Diet Coke		16 Diet Coke
AZC	013	245	0	8	0	0	0	0	8																AZC	013	3	B	SEV		Bottled
AZC	036	238	17.2	7.5	30.96	156	186.96	238	0.5	0	4	10	1	0	2	24	2			18	6				AZC	036	3	G	SEV		Tap Water	Kroger	Dasani	Starbucks	Coffee		Tea
AZC	077	16	12.7143	7	21.36	57.5	78.86	14	3	16	2	13	1	2	1	18	2			14	0.5	29	0.5		AZC	077	3	B	SEV		Tap Water	Filtered	Evian	Fiji	Tea		Mount Dew	Coke
CAC	005	69	1	13	3.12	81	84.12	2	6.5	0	6.5					18	4.5								CAC	005	3	B	SEV		Purified	Sparklets			Tea
CAL	008	4	1.6	20	7.68	129	136.68	1	8	4	6	0	3	0	3	18	4	57	1						CAL	008	2	B	SEV		Palomar	Tap Water	Kirkland	Smart	Tea	Wine			Escondido
Mean		151.469	39.7671	32	97.2232	95.5969	192.82
SW All		Tap	WatAv	Num	WatMg	BevMg	TotMg
Sdev		108.737	37.4696		103.231	88.9981	133.092
AZC	007	176	53.8462	13	168	199	367	19	8	176	3	10	2			18	5			24	4	13	1		AZC	007	13	B	M		RO Filtered	Tap Water	Dasani		Tea		Milk	Juice Citrus
AZC	010	64	11.6364	11	30.72	68	98.72	64	2	0	4	0	5							14	3	13	2		AZC	010	2	B	M		SRP Tap	Filtered	Great Value				Sprite	Tropicana
AZC	55.1	26	22	17	89.76	113	202.76	26	12	13	4	10	1			21	4			29	1				AZC	55.1	16	B	M		Well Water	Mom's	Dasani		Coffee, Tea		Cola
AZC	55.2	26	22	17	89.76	113	202.76	26	12	13	4	10	1			21	4			29	1				AZC	55.2	18	B	M		Well Water	Mom's	Dasani		Coffee, Tea		Cola
AZC	070	170	123.5	16	474.24	66	540.24	162	8	170	4	0	4			22	3								AZC	070	4	B	M		Tap Water	Fridge Filter	Generic		Coffee, Tea
AZC	86.1	220	50.7692	6.5	79.2	220	299.2	220	1.5	0	5					18	2			24	4	22	4		AZC	86.1	1.5	B	M		Tap Water	Circle K			Tea		Milk	Soda
CAC	002	105	29.7273	11	78.48	72	150.48	103	2	105	1	2	8			24	2			24	1				CAC	002	8	B	M		Kitchen	Bathroom	All Types		Coffee, Tea		Milk
CAC	009	180	164.581	9.3	367.344	79.2	446.544	180	6	150	3	2	0.3			24	3			24	0.3				CAC	009	14	B	M		Tap Water	Brita	All Types		Coffee, Tea		Milk, Soda
CAC	018	210	35.8333	12	103.2	90	193.2	1	8	210	2	1	2			18	5								CAC	018	2	B	M		Filter Station	Cook Tap	Crystal Geyser		Tea, Coffee
CAC	019	186	66.7273	11	176.16	56	232.16	186	1	131	4	10	2	1	4					14	2	14	2		CAC	019	4	G	M		Tap Water	Pur Filter	Dasani	Crystal Geyser			Ginger Ale	Club Soda
CAC	020	118	51.3333	9	110.88	60	170.88	43	8	118	1					24	1			18	2				CAC	020	7	G	M		Arrowhead	Tap Water			Coffee		Rasp Tea
CAC	052	169	40.8889	9	88.32	49	137.32	169	2	211	0	0	4	10	3	18	2			13	1				CAC	052	6	B	M		Tap Water	Unknown	Kroger	Niagra	Tea		Juice
CAC	074	139	82.4	5	98.88	50	148.88	132	1	139	2	1	2							24	1	13	2		CAC	074	9	B	M		Tap Water	Filtered	Crystal Geyser				Milk	Apple Juice
CAC	085	111	0	11	0	88.5	88.5	0	7.5	0	3.5					22	3			13	1.5	2	1.5		CAC	085	4.5	B	M		Alkaline pH	Distilled			Coffee, Tea		Orange J	VitaCoco	No Tap Wat
Mean		135.714	53.9459	14	139.639	94.55	234.189
SW Mild		Tap	WatAv	Num	WatMg	BevMg	TotMg
Sdev		63.3154	44.6303		128.939	52.9071	133.457
AZC	014	246	63	8	120.96	0	120.96	246	2	2	6														AZC	014	2	B	MO		Tap Water	Purified
AZC	15.1	91	11.6154	13	36.24	76	112.24	91	1	0	6	10	6							8	6	14	2		AZC	15.1	3	B	MO		Water Soft	RO Filtered	Dasani				Gatorade	Dr. Pepper	3 Children
AZC	15.2	91	11.6154	13	36.24	76	112.24	91	1	0	6	10	6							8	6	14	2		AZC	15.2	8	B	MO		Water Soft	RO Filtered	Dasani				Gatorade	Dr. Pepper
AZC	15.3	91	11.6154	13	36.24	76	112.24	91	1	0	6	10	6							8	6	14	2		AZC	15.3	12	G	MO		Water Soft	RO Filtered	Dasani				Gatorade	Dr. Pepper
AZC	016	245	0.25	12	0.72	0	0.72	1	3	0	3	0	3	0	3										AZC	016	3	G	MO		Sparklets	Molinito	Fry's	Food City					From Letter
AZC	041	230	66.4615	13	207.36	96.5	303.86	15	6	230	3	0	2	42	2	24	2			13	1.5	29	1		AZC	041	3	G	MO		Filter Sink	Refrigerator	Fry's	Arrowhead	Coffee		Orange J	Coke
AZC	084	82	46.8	17.5	196.56	58.6	255.16	82	9	81	1	0	5	0	2.5	18	1.3			29	0.8	24	0.5		AZC	084	2.5	B	MO		Tap Water	Bathroom	Walmart	Bashas	Tea		Coke	Coffee
AZC	86.2	220	50.7692	6.5	79.2	220	299.2	220	1.5	0	5					18	2			24	4	22	4		AZC	86.2	2.5	B	MO		Tap Water	Circle K			Tea		Milk	Soda
CAC	012	540	37.8261	5.75	52.2	58.8	111	15	5.5	540	0.25					24	2			18	0.5	18	0.1		CAC	012	2	B	MO		Filtered	Cooking			Coffee		Tejava	Star Tea
CAC	033	305	62	7	104.16	58	162.16	305	1	43	3	0	3							29	1	29	1		CAC	033	3	B	MO		Tap Water	Arrowhead	Aquafina				Pepsi	Coke
CAL	006	37	13.6667	12	39.36	24	63.36	2	8	37	4					24	1								CAL	006	2	B	MO		Ralphs	Tap Water			Coffee
CAC	075	170	86.6154	6.5	135.12	86	221.12	170	2.5	40	2	42	1	16	1	18	2			14	1.5	29	1		CAC	075	3	B	MS		Tap Water	Bottled	Arrowhead	Nestle	Tea		Fanta Soda	Coke
CAL	021	27	22.5556	9	48.72	482	530.72	27	4	39	2	8	2	1	1	18	1			29	16				CAL	021	3	B	MS		Tap Water	Arrowhead	Dasani+Life	Crystal Geyser	Tea		Diet Coke		16 Diet Coke
Mean		182.692	37.2916	13	84.0831	100.915	184.998
SW Mod		Tap	WatAv	Num	WatMg	BevMg	TotMg
Sdev		139.981	27.314		64.7581	126.886	137.736
AZC	013	245	0	8	0	0	0	0	8																AZC	013	3	B	SEV		Bottled
AZC	036	238	17.2	7.5	30.96	156	186.96	238	0.5	0	4	10	1	0	2	24	2			18	6				AZC	036	3	G	SEV		Tap Water	Kroger	Dasani	Starbucks	Coffee		Tea
AZC	077	16	12.7143	7	21.36	57.5	78.86	14	3	16	2	13	1	2	1	18	2			14	0.5	29	0.5		AZC	077	3	B	SEV		Tap Water	Filtered	Evian	Fiji	Tea		Mount Dew	Coke
CAC	005	69	1	13	3.12	81	84.12	2	6.5	0	6.5					18	4.5								CAC	005	3	B	SEV		Purified	Sparklets			Tea
CAL	008	4	1.6	20	7.68	129	136.68	1	8	4	6	0	3	0	3	18	4	57	1						CAL	008	2	B	SEV		Palomar	Tap Water	Kirkland	Smart	Tea	Wine			Escondido
Mean		114.4	6.50286	5	12.624	84.7	97.324
SW Sev		Tap	WatAv	Num	WatMg	BevMg	TotMg
Sdev		118.601	7.89964		13.1021	61.1837	69.9477

## Sheet: High Prev
		Autism Data Chart (High Prev)
	S1-S4 are water sample sulfate values in mg/l									Coff, Beer, Liq7 and Liq8 are beverage values in mg/serving																Xyy is a rejected data line
	G1-G4 are water sample 8 oz glasses per day									G5 thru G8 are beverage servings (glasses)																Uyy is from USA at large
	GT4 = G1+G2+G3+G4									Water sulfate in mg: WatMg = (0.24g/glass)*WatAv*GT4																Hyy is a high incidence state
	WatAv is average water sulfate weighted by glasses									Beverage sulfate in mg: BevMg = B5G5+B6G6+B7G7+B8G8																Lyy is a low incidence state
	WatAv = (S1G1+S2G2+S3G3+S4G4) / GT4									AZC means Phoenix and Tucson canal zone at ~245 mg/l																AZC is Arizonal canal zone
	Degree = M (mild), MO (mod), MS (mod/sev), SEV (severe)									CAC is California coast 60-400 mg/l while CAL is 0-59 mg/l																CAC and CAL are SoCal coast
Zone	Key	Tap	WatAv	GT4	WatMg	BevMg	TotMg	S1	G1	S2	G2	S3	G3	S4	G4	Coff	G5	Beer	G6	Liq7	G7	Liq8	G8		Zone	Key	Age	Sex	Deg		Sample 1	Sample 2	Brand 3	Brand 4	Coffee 5	B 6	Liquid 7	Liquid 8	Notes
HIN	053	56	49	12	141.12	102.8	243.92	49	3	63	7	0	2			24	3.2			13	1.5	13	0.5		HIN	053	3	G	M		Sink Tap	Fridge Filter
HIN	059	65	35	16	134.4	66	200.4	65	8	0	4	10	4			22	3								HIN	059	NA	B	M		Tap Water	Aquafina	Dasani		Coffee, Tea
HMA	031	32	29.6	5	35.52	66	101.52	32	3	47	1	5	1			21	2			0	1	24	1		HMA	031	4	B	M		Tap Water	Acadia Sp	Poland Sp		Tea, Coffee		Polar Selzter	Milk
HMA	062	0	3	5	3.6	35.75	39.35	0	2	0	0	5	3			24	1	47	0.25						HMA	062	14	G	M		Tap Water	Repeat	Poland Sp		Coffee	Beer
HME	3.1	1	0.857143	7	1.44	48	49.44	1	3	1	3	0	1			24	2								HME	3.1	13	G	M		Tap Water	Brita	Aquafina		Coffee
HME	054	28	19	8	36.48	48	84.48	28	4	29	0	10	4							24	2				HME	054	13	B	M		Tap Water	Repeat	Work Est				Milk
HOR	061	3	1	14	3.36	28	31.36	0	6	3	4	0	2	1	2					14	2				HOR	061	16	B	M		Tap Water	Alt Tap	Aquafina	EartH2O			Dr. Pepper
HPA	037	72	71.6667	6	103.2	174	277.2	72	4	71	2									29	6				HPA	037	11	B	M		Filter Well	Raw Well					Diet Pepsi
HPA	044	2	2	12	5.76	208	213.76	2	4	2	8					21	7			13	1	24	2		HPA	044	2	B	M		Brita Filter	Well Water			Coffee, Tea		Orange J	Milk
HCT	058	45	39	7	65.52	54	119.52	45	4	44	2	5	1							36	1	18	1		HCT	058	2	B	MO		Home Tap	Other Tap	Poland Sp				Grape Soda	CL Tea
HMA	025	5	5.45536	5.6	7.332	33.57	40.902	5	5	3	0.1	16	0.25	5	0.25	24	1			29	0.33				HMA	025	2	G	MO		Kitchen	Bathroom	Nestle	Poland Sp	Coffee		Soda
HMN	048	52	17.3333	24	99.84	0	99.84	52	8	0	8	0	8												HMN	048	2	B	MO		Well Water	RO Filtered	Smart Water
HMN	073	40	9.5	8	18.24	92.5	110.74	40	1	33	1	0	3	1	3	24	2.5			13	2.5				HMN	073	6	B	MO		Tap Water	Tap Water	Generic	Vitamin W	Coffee		Lemonade
HOR	029	2	2	8	3.84	108	111.84	2	4	2	4					20	3			24	2				HOR	029	5	B	MO		Tap Water	Well Water			Tea, Coffee		Raw Milk
HOR	066	14	13.0588	17	53.28	24	77.28	13	16	14	1					24	1								HOR	066	6	B	MO		Brita Filter	Tap Water			Coffee
HOR	067	3	2.45	10	5.88	79.5	85.38	3	6.5	2	2.5	0	0.5	0	0.5	24	1.5			29	1.5				HOR	067	6	B	MO		Tap Water	Fred Mayer	FM Purified	Winco	Coffee		Cola
HPA	022	47	25.1667	12	72.48	129	201.48	47	4	42	2	5	6			24	1			27	3	24	1		HPA	022	3	G	MO		Tap Water	Well Water	Deer Park		Coffee		Soda, Propel	Milk
HPA	065	31	30.5	6	43.92	42	85.92	30	3	31	3									29	1	13	1		HPA	065	3	B	MO		Primary	Secondary					Diet Pepsi	Orange J
HMN	060	18	13.7143	3.5	11.52	4.2	15.72	13	3	18	0.5					18	0.1			24	0.1				HMN	060	3	G	MS		Ice Mountain	Tap Water			Tea		Milk
HPA	081	17	11.25	6	16.2	85	101.2	17	3.5	2	1.5	5	1			24	1			24	2	13	1		HPA	081	6	B	MS		Well Water	Nature's Spring	Deer Park		Coffee		Milk	Orange J
HCT	051	44	44	5	52.8	88.5	141.3	44	5							18	2.5			29	1.5				HCT	051	3	B	SEV		Tap Water				Tea		Diet Pepsi
HME	3.2	1	0.857143	7	1.44	48	49.44	1	3	1	3	0	1			24	2								HME	3.2	15	B	SEV		Tap Water	Brita	Aquafina		Coffee
Mean		26.2727	19.3368	22	41.6896	71.1282	112.818
High All		Tap	WatAv	Num	WatMg	BevMg	TotMg
Sdev		23.365	19.1795		44.157	51.2373	72.1873
HIN	053	56	49	12	141.12	102.8	243.92	49	3	63	7	0	2			24	3.2			13	1.5	13	0.5		HIN	053	3	G	M		Sink Tap	Fridge Filter
HIN	059	65	35	16	134.4	66	200.4	65	8	0	4	10	4			22	3								HIN	059	NA	B	M		Tap Water	Aquafina	Dasani		Coffee, Tea
HMA	031	32	29.6	5	35.52	66	101.52	32	3	47	1	5	1			21	2			0	1	24	1		HMA	031	4	B	M		Tap Water	Acadia Sp	Poland Sp		Tea, Coffee		Polar Selzter	Milk
HMA	062	0	3	5	3.6	35.75	39.35	0	2	0	0	5	3			24	1	47	0.25						HMA	062	14	G	M		Tap Water	Repeat	Poland Sp		Coffee	Beer
HME	3.1	1	0.857143	7	1.44	48	49.44	1	3	1	3	0	1			24	2								HME	3.1	13	G	M		Tap Water	Brita	Aquafina		Coffee
HME	054	28	19	8	36.48	48	84.48	28	4	29	0	10	4							24	2				HME	054	13	B	M		Tap Water	Repeat	Work Est				Milk
HOR	061	3	1	14	3.36	28	31.36	0	6	3	4	0	2	1	2					14	2				HOR	061	16	B	M		Tap Water	Alt Tap	Aquafina	EartH2O			Dr. Pepper
HPA	037	72	71.6667	6	103.2	174	277.2	72	4	71	2									29	6				HPA	037	11	B	M		Filter Well	Raw Well					Diet Pepsi
HPA	044	2	2	12	5.76	208	213.76	2	4	2	8					21	7			13	1	24	2		HPA	044	2	B	M		Brita Filter	Well Water			Coffee, Tea		Orange J	Milk
Mean		28.7778	23.4582	9	51.6533	86.2833	137.937
High Mild		Tap	WatAv	Num	WatMg	BevMg	TotMg
Sdev		29.3972	25.1531		58.3822	63.7246	95.7673
HCT	058	45	39	7	65.52	54	119.52	45	4	44	2	5	1							36	1	18	1		HCT	058	2	B	MO		Home Tap	Other Tap	Poland Sp				Grape Soda	CL Tea
HMA	025	5	5.45536	5.6	7.332	33.57	40.902	5	5	3	0.1	16	0.25	5	0.25	24	1			29	0.33				HMA	025	2	G	MO		Kitchen	Bathroom	Nestle	Poland Sp	Coffee		Soda
HMN	048	52	17.3333	24	99.84	0	99.84	52	8	0	8	0	8												HMN	048	2	B	MO		Well Water	RO Filtered	Smart Water
HMN	073	40	9.5	8	18.24	92.5	110.74	40	1	33	1	0	3	1	3	24	2.5			13	2.5				HMN	073	6	B	MO		Tap Water	Tap Water	Generic	Vitamin W	Coffee		Lemonade
HOR	029	2	2	8	3.84	108	111.84	2	4	2	4					20	3			24	2				HOR	029	5	B	MO		Tap Water	Well Water			Tea, Coffee		Raw Milk
HOR	066	14	13.0588	17	53.28	24	77.28	13	16	14	1					24	1								HOR	066	6	B	MO		Brita Filter	Tap Water			Coffee
HOR	067	3	2.45	10	5.88	79.5	85.38	3	6.5	2	2.5	0	0.5	0	0.5	24	1.5			29	1.5				HOR	067	6	B	MO		Tap Water	Fred Mayer	FM Purified	Winco	Coffee		Cola
HPA	022	47	25.1667	12	72.48	129	201.48	47	4	42	2	5	6			24	1			27	3	24	1		HPA	022	3	G	MO		Tap Water	Well Water	Deer Park		Coffee		Soda, Propel	Milk
HPA	065	31	30.5	6	43.92	42	85.92	30	3	31	3									29	1	13	1		HPA	065	3	B	MO		Primary	Secondary					Diet Pepsi	Orange J
HMN	060	18	13.7143	3.5	11.52	4.2	15.72	13	3	18	0.5					18	0.1			24	0.1				HMN	060	3	G	MS		Ice Mountain	Tap Water			Tea		Milk
HPA	081	17	11.25	6	16.2	85	101.2	17	3.5	2	1.5	5	1			24	1			24	2	13	1		HPA	081	6	B	MS		Well Water	Nature's Spring	Deer Park		Coffee		Milk	Orange J
Mean		24.9091	15.4026	11	36.1865	59.2518	95.4384
High Mod		Tap	WatAv	Num	WatMg	BevMg	TotMg
Sdev		18.7641	11.7924		32.7243	42.648	47.15
HCT	051	44	44	5	52.8	88.5	141.3	44	5							18	2.5			29	1.5				HCT	051	3	B	SEV		Tap Water				Tea		Diet Pepsi
HME	3.2	1	0.857143	7	1.44	48	49.44	1	3	1	3	0	1			24	2								HME	3.2	15	B	SEV		Tap Water	Brita	Aquafina		Coffee
Mean		22.5	22.4286	2	27.12	68.25	95.37
High Sev		Tap	WatAv	Num	WatMg	BevMg	TotMg
Sdev		30.4056	30.5066		36.317	28.6378	64.9548

## Sheet: Low Prev
		Autism Data Chart (Low Prev)
	S1-S4 are water sample sulfate values in mg/l									Coff, Beer, Liq7 and Liq8 are beverage values in mg/serving																Xyy is a rejected data line
	G1-G4 are water sample 8 oz glasses per day									G5 thru G8 are beverage servings (glasses)																Uyy is from USA at large
	GT4 = G1+G2+G3+G4									Water sulfate in mg: WatMg = (0.24g/glass)*WatAv*GT4																Hyy is a high incidence state
	WatAv is average water sulfate weighted by glasses									Beverage sulfate in mg: BevMg = B5G5+B6G6+B7G7+B8G8																Lyy is a low incidence state
	WatAv = (S1G1+S2G2+S3G3+S4G4) / GT4									AZC means Phoenix and Tucson canal zone at ~245 mg/l																AZC is Arizonal canal zone
	Degree = M (mild), MO (mod), MS (mod/sev), SEV (severe)									CAC is California coast 60-400 mg/l while CAL is 0-59 mg/l																CAC and CAL are SoCal coast
Zone	Key	Tap	WatAv	GT4	WatMg	BevMg	TotMg	S1	G1	S2	G2	S3	G3	S4	G4	Coff	G5	Beer	G6	Liq7	G7	Liq8	G8		Zone	Key	Age	Sex	Deg		Sample 1	Sample 2	Brand 3	Brand 4	Coffee 5	B 6	Liquid 7	Liquid 8	Notes
LIA	045	34	21.5	8	41.28	72	113.28	34	5	2	1	0	2							29	2	14	1		LIA	045	5	B	M		Tap Water	Work Wat	Hy-Vee				Coke	Lemonade
LKS	050	40	32.125	8	61.68	0	61.68	40	3	39	3	10	2												LKS	050	4	G	M		Sink Tap	Fridge Filter	Dasani
LLA	024	2	5.97351	15.1	21.648	294	315.648	2	0.1	6	15									29	7	13	7		LLA	024	7	G	M		Tap Water	Bottled Mix					Coke	Juicy Juice
LMS	039	2	1	16	3.84	66	69.84	0	8	2	8					22	3								LMS	039	5	B	M		Tap Water	Tap Water			Coffee, Tea
LMT	064	384	68.7059	8.5	140.16	79.5	219.66	0	6	384	1.5	0	0.5	16	0.5					24	2.5	13	1.5		LMT	064	6	G	M		Culligan	Well Water	Generic	Nestle			Milk	Juice, soda
LMT	080	665	180.5	8	346.56	48	394.56	665	2	19	6					24	2								LMT	080	3	G	M		Well Water	Albertson's			Coffee
LNM	032	360	280.5	6	403.92	48	451.92	321	3	360	2	0	0.5	0	0.5	24	2								LNM	032	5	G	M		Fridge	Tap Water	Walmart	Kroger	Coffee
LNM	69.1	104	68.4444	18	295.68	14.5	310.18	24	8	104	10									29	0.5				LNM	69.1	7	B	M		Tap Water	Well Water					Coke
LCO	047	54	35.7143	17.5	150	58.25	208.25	17	8	92	5	10	2.5	2	2	21	2			13	1.25				LCO	047	7	B	MO		Home Tap	Work Tap	Dasani	Fiji	Coffee, Tea		Orange J
LCO	083	27	26.1111	9	56.4	49	105.4	27	5	25	4					18	2			13	1				LCO	083	17	B	MO		Tap Water	Brita Pitcher			Tea		Juice
LIA	027	61	44.8462	6.5	69.96	45	114.96	61	3.5	62	1	0	1	16	1					14	1.5	24	1		LIA	027	4	B	MO		Tap Water	Parents	Aquafina	Nestle			Cherry Soda	Milk
LIA	068	50	49	11	129.36	145	274.36	48	5.5	50	5.5					21	4			24	2	13	1		LIA	068	2	B	MO		Tap Water	Tap Water			Coffee, Tea		Milk	Orange J
LKS	040	89	17.8571	7	30	0	30	89	1	1	4	16	2												LKS	040	16	B	MO		Tap Water	Great Value	Nestle
LLA	026	11	10.5652	11.5	29.16	72	101.16	10	7	11	1.5	16	2	3	1					29	2	14	1		LLA	026	2	B	MO		Filtered Tap	Tap Water	Nestle	Ozarka			Coke	Sprite
LMS	056	0	0.333333	6	0.48	18	18.48	0	4	1	2					18	1								LMS	056	15	B	MO		Tap Water	Kentwood			Tea
LMT	076	3	2.61538	13	8.16	48	56.16	3	10	2	2	0	1			24	2								LMT	076	9	B	MO		Well Water	Well Water	Smart Water		Coffee
LNM	69.2	104	68.4444	18	295.68	14.5	310.18	24	8	104	10									29	0.5				LNM	69.2	8	B	MO		Tap Water	Well Water					Coke
LOK	030	2	3.5	8	6.72	189	195.72	2	4	5	4					20	3			29	3	14	3		LOK	030	4	G	MO		Tap Water	Bottled Mix			Tea, Coffee		Coke	Dr. Pepper
LOK	035	29	20.0385	13	62.52	55	117.52	29	7	23	2.5	0	3.5			18	1.5			14	1	14	1		LOK	035	3	B	MO		Tap Water	Filtered	Smart Water		Tea		Root Beer	Sprite
LOK	046	6	3.70588	17	15.12	36	51.12	6	8	1	6	3	3			18	2								LOK	046	5	G	MO		Tap Water	Filtered	Ozarka		Tea
LOK	057	117	63.5882	8.5	129.72	84	213.72	117	0.5	118	4	0	2	5	2	21	4								LOK	057	10	B	MO		Tap Water	Fridge Filter	Sam's Ch	Niagra	Coffee, Tea
LCO	043	17	17	9	36.72	60	96.72	17	9											24	2.5				LCO	043	4	G	SEV		Tap Water						Milk
LMS	082	1	0.5	12	1.44	87	88.44	1	6	0	6					18	1.5			24	2.5				LMS	082	3	B	SEV		Tap Water	Tap Water			Tea		Milk
Mean		94	44.4595	23	101.574	68.8152	170.389
Low All		Tap	WatAv	Num	WatMg	BevMg	TotMg
Sdev		161.418	65.0124		120.214	65.1329	122.319
LIA	045	34	21.5	8	41.28	72	113.28	34	5	2	1	0	2							29	2	14	1		LIA	045	5	B	M		Tap Water	Work Wat	Hy-Vee				Coke	Lemonade
LKS	050	40	32.125	8	61.68	0	61.68	40	3	39	3	10	2												LKS	050	4	G	M		Sink Tap	Fridge Filter	Dasani
LLA	024	2	5.97351	15.1	21.648	294	315.648	2	0.1	6	15									29	7	13	7		LLA	024	7	G	M		Tap Water	Bottled Mix					Coke	Juicy Juice
LMS	039	2	1	16	3.84	66	69.84	0	8	2	8					22	3								LMS	039	5	B	M		Tap Water	Tap Water			Coffee, Tea
LMT	064	384	68.7059	8.5	140.16	79.5	219.66	0	6	384	1.5	0	0.5	16	0.5					24	2.5	13	1.5		LMT	064	6	G	M		Culligan	Well Water	Generic	Nestle			Milk	Juice, soda
LMT	080	665	180.5	8	346.56	48	394.56	665	2	19	6					24	2								LMT	080	3	G	M		Well Water	Albertson's			Coffee
LNM	032	360	280.5	6	403.92	48	451.92	321	3	360	2	0	0.5	0	0.5	24	2								LNM	032	5	G	M		Fridge	Tap Water	Walmart	Kroger	Coffee
LNM	69.1	104	68.4444	18	295.68	14.5	310.18	24	8	104	10									29	0.5				LNM	69.1	7	B	M		Tap Water	Well Water					Coke
Mean		198.875	82.3436	8	164.346	77.75	242.096
Low Mild		Tap	WatAv	Num	WatMg	BevMg	TotMg
Sdev		243.912	98.5269		160.464	91.6157	149.588
LCO	047	54	35.7143	17.5	150	58.25	208.25	17	8	92	5	10	2.5	2	2	21	2			13	1.25				LCO	047	7	B	MO		Home Tap	Work Tap	Dasani	Fiji	Coffee, Tea		Orange J
LCO	083	27	26.1111	9	56.4	49	105.4	27	5	25	4					18	2			13	1				LCO	083	17	B	MO		Tap Water	Brita Pitcher			Tea		Juice
LIA	027	61	44.8462	6.5	69.96	45	114.96	61	3.5	62	1	0	1	16	1					14	1.5	24	1		LIA	027	4	B	MO		Tap Water	Parents	Aquafina	Nestle			Cherry Soda	Milk
LIA	068	50	49	11	129.36	145	274.36	48	5.5	50	5.5					21	4			24	2	13	1		LIA	068	2	B	MO		Tap Water	Tap Water			Coffee, Tea		Milk	Orange J
LKS	040	89	17.8571	7	30	0	30	89	1	1	4	16	2												LKS	040	16	B	MO		Tap Water	Great Value	Nestle
LLA	026	11	10.5652	11.5	29.16	72	101.16	10	7	11	1.5	16	2	3	1					29	2	14	1		LLA	026	2	B	MO		Filtered Tap	Tap Water	Nestle	Ozarka			Coke	Sprite
LMS	056	0	0.333333	6	0.48	18	18.48	0	4	1	2					18	1								LMS	056	15	B	MO		Tap Water	Kentwood			Tea
LMT	076	3	2.61538	13	8.16	48	56.16	3	10	2	2	0	1			24	2								LMT	076	9	B	MO		Well Water	Well Water	Smart Water		Coffee
LNM	69.2	104	68.4444	18	295.68	14.5	310.18	24	8	104	10									29	0.5				LNM	69.2	8	B	MO		Tap Water	Well Water					Coke
LOK	030	2	3.5	8	6.72	189	195.72	2	4	5	4					20	3			29	3	14	3		LOK	030	4	G	MO		Tap Water	Bottled Mix			Tea, Coffee		Coke	Dr. Pepper
LOK	035	29	20.0385	13	62.52	55	117.52	29	7	23	2.5	0	3.5			18	1.5			14	1	14	1		LOK	035	3	B	MO		Tap Water	Filtered	Smart Water		Tea		Root Beer	Sprite
LOK	046	6	3.70588	17	15.12	36	51.12	6	8	1	6	3	3			18	2								LOK	046	5	G	MO		Tap Water	Filtered	Ozarka		Tea
LOK	057	117	63.5882	8.5	129.72	84	213.72	117	0.5	118	4	0	2	5	2	21	4								LOK	057	10	B	MO		Tap Water	Fridge Filter	Sam's Ch	Niagra	Coffee, Tea
Mean		42.5385	26.64	13	75.6369	62.5962	138.233
Low Mod		Tap	WatAv	Num	WatMg	BevMg	TotMg
Sdev		40.5989	23.6936		83.262	52.4616	93.8992
LCO	043	17	17	9	36.72	60	96.72	17	9											24	2.5				LCO	043	4	G	SEV		Tap Water						Milk
LMS	082	1	0.5	12	1.44	87	88.44	1	6	0	6					18	1.5			24	2.5				LMS	082	3	B	SEV		Tap Water	Tap Water			Tea		Milk
Mean		9	8.75	2	19.08	73.5	92.58
Low Sev		Tap	WatAv	Num	WatMg	BevMg	TotMg
Sdev		11.3137	11.6673		24.9467	19.0919	5.85484
